# Supplementary material
Source: ML conference proceedings conference paper supplement (https://openaccess.thecvf.com/content/ICCV2025/html/Zhou_DOGR_Towards_Versatile_ICCV_2025_paper.html)
Supplement: Supplementary file 1 [file 7172_supp.pdf › 7172_supp.pdf]

## A. The Annotation Results

### A.1. Poster and Chart Annotations

As shown in Fig. 6, we present a comparison between our annotations and the original annotations.

In the original poster annotations, some text image layers are damaged, and some bounding boxes are inaccurate, which hinders precise text recognition and localization. In the annotations obtained using our Re-rendering Strategy, we reconstruct the text layers and achieve accurate bounding box annotations. Additionally, we include global content information from the original dataset, such as text format, title and keywords to enhance global awareness during instruction-tuning data generation. We use the values of “text\_with\_box” as the annotations for poster’s full-page parsing data.

In original chart annotations from ChartQA, some bounding boxes are associated with bars/lines rather than text value. This is inconsistent with our text and bounding box correspondence objectives. Additionally, the bounding boxes in the original annotations are not accurate. In our re-rendered annotations, we align the bounding boxes with the text value, and the bounding boxes are accurate. Furthermore, we randomly erase some of the values to ensure that the model can infer the missing values based on other visual information. We use the entire chart JSON dict as the annotations for the full-page parsing of the chart. Due to space constraints, we omit some of the content using ‘...’.

### A.2. PDF Document Annotations

As shown in Fig. 7, we present a comparison between the ordered annotations from MinerU and the unordered but comprehensive annotations from PyMuPDF, along with the combined annotations using our Merge Strategy. We utilize green arrows to indicate the ordered annotations and gray arrows to indicate the naive scanning order. By combining the two annotation methods, we achieve full-page parsing annotations that are both comprehensive and as ordered as possible. Moreover, our method can become more effective as the performance of the ordered annotation tools improves. Due to space constraints, we omit the content in the middle of this passage.

## B. Prompts and Instructions

### B.1. Prompt Details

In Fig. 8, we show three different prompts for poster, chart and PDF document:

For poster, we deploy plain text input as prompt. Besides format information and rule information, we also provide GPT-4o with some of the overall content and style information from the original Crello dataset. This helps in achieving

a better global understanding, thereby improving the generation of instruction-tuning data.

For chart, since the content of the charts only contains some numbers and lacks an introduction to the meaning of the content being statistically represented, we add a question answering data from the original ChartQA to help GPT-4o better understand the meaning conveyed by the chart content. Additionally, when the model generates output, we output the masked values in the grounded format “<ocr>text</ocr><bbox>null</bbox>” as well. After obtaining the output, we perform format filtering to degrade this part of the content into plain text and remove the degraded plain text item in “necessary bbox”.

For PDF document, we directly send the images and simple output format rules to GPT-4o, obtaining the output with the original text wrapped in “<ocr></ocr>”. Then, we use PyMuPDF to query these contents, find the corresponding coordinates, and normalize them. After that, we wrap the coordinates in “<bbox></bbox>” and append them to the original wrapped text.

After obtaining the output from GPT-4o, we perform format filtering to remove samples that do not meet the format requirements. And we also perform grounded data checking to correct or remove samples that have incorrect grounding content. We change the grounded blocks “<ocr></ocr><bbox></bbox>” in the questions to “<bbox></bbox>”. Finally, we combine various answers and reasoning to obtain different types of tasks introduced in Sec. 4.

### B.2. Instruction Details

As shown in Fig. 9, we introduce the instruction utilized in Multi-granular Parsing tasks and the response format prompts which are followed by the questions for instruction-tuning data. For Bounding Box & Text Localization, we introduce 4 instructions for each task, the answer is directly wrapped with “<ocr></ocr>” or “<bbox></bbox>”. For Full-page Parsing, we introduce 3 instructions for poster data, 1 for chart, and 1 for PDF document data. The responses are in the format shown in Fig. 6 and Fig. 7.

We add different response format prompts to different questions based on the format of the responses to help the model output corresponding results when users interact with it. For generated question and answer pairs, we combine different question and answer pairs with various response format prompts to obtain diverse grounded data. For Grounded Answering Data, we have 7 response format prompts to be added after the question, and the answer should be directly a simple text wrapped with “<ocr></ocr>” and followed by the coordinates wrapped with “<bbox></bbox>”. For Grounded Reasoning Data, we combine two random-chosen prompts to-

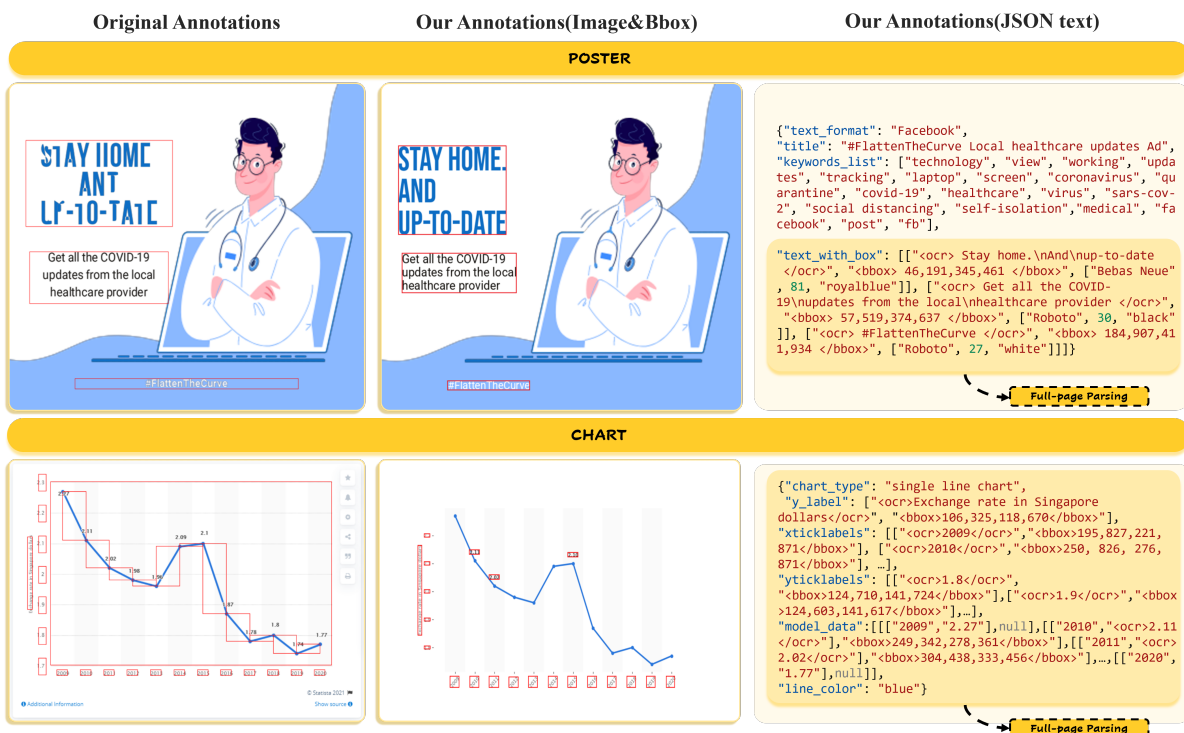

Figure 6. Comparison of origin annotation and our new constructed annotation.

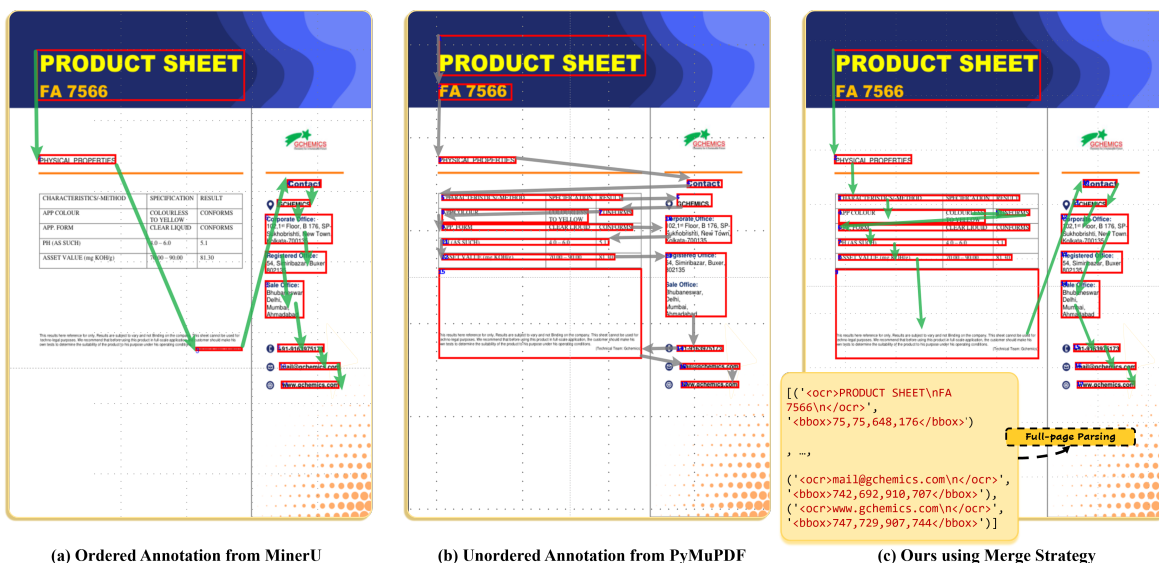

Figure 7. PDF Document Parsing results comparison of ordered annotation from MinerU, unordered annotation from PyMuPDF, and our annotation using the Merge Strategy. Green arrow indicates the ordered annotations and Gray arrow indicates the naive scanning order.

gether to form the response format prompt, and the response should be such a sentence structure involves a segment of grounded reasoning followed by "Answer: " and a concise answer. For Grounded Open-ended Answering, we simply use the first part of the response format prompts

for Grounded Reasoning, and the response should be a grounded reasoning sentence. For Plain text Answering, we add no response format prompt to keep consistent with the original question answering.

#### Poster Q&A Generation Prompts for GPT-4o

##### System prompt:

You are a poster expert. I'll give you the data about a poster, including some implicit content and a Text box list. Each list item correspond to one box in the poster and represents a segment of text in the poster. The format of each item is [`<ocr>text</ocr>`, `<bbox>bounding box coordinates</bbox>`, (font name, font size, font color)].The list order is somewhat disorganized. You need to reorder these text boxes to make them logically smooth. Please generate 3 most valuable question & answer & explanation & The necessary bbox list to obtain the answer for the content in text box list in json format:

```
[{'question':'','answer':'','explanation':'',' necessary bbox':['<ocr></ocr><bbox></bbox>']},...].
```

The question types can include factual judgments, factual inquiries, multi-step reasoning, math reasoning, extended understanding, summarize, etc. Note that the implicit content is only for your comprehension for better questions, so don't ask for that content. Note that the response must be related at least one item in the list. In question, you can substitute the text in '`<ocr></ocr>`' with corresponding bbox in '`<bbox></bbox>`', but don't ask too simple questions, like 'What is the text mentioned in `<bbox>A,B,C,D</bbox>`'.Don't ask about detailed font name or size. When citing a text with corresponding bbox in answer / explanation, enclose it in '`<ocr></ocr>`' followed by its bbox in '`<bbox></bbox>`', formatted as follows: '`<ocr> apple </ocr><bbox>A,B,C,D</bbox>`', where 'A,B,C,D' represents the bbox for 'apple'. The necessary bbox must in your explanation. Assume you directly obtain the poster data based on the poster image, so avoid phrases like 'based on data'. Your answer should be one word or one span, and your explanation should be simple but reasonable.

##### User prompt:

Here is a poster with the theme [title] in [text\_format] style. Here are some related keywords:[keywords\_list]. Text box list:[Full-page parsing JSON data]

#### Chart Q&A Generation Prompts for GPT-4o

##### System prompt:

You are a chart expert. Here is the data about a chart, including its components and corresponding bounding boxes (bboxes). Additionally, I will give you a question and answer pair to let you know what the chart data represents for. Please generate 3 most valuable question & answer & explanation &The necessary bbox list. Output in JSON format:

```
[{'question':'','answer':'','explanation':'',' necessary bbox':['<ocr></ocr><bbox></bbox>']},...].
```

The type can include multi step reasoning, math reasoning, extended understanding, color-related reasoning, summarize etc.In question, you can generate pure text question, or question with bbox in '`<bbox></bbox>`' to substitute text in '`<ocr></ocr>`'.

When citing a text or data with corresponding bbox in your answer, enclose it in '`<ocr></ocr>`' followed by its bbox in '`<bbox></bbox>`', formatted as follows: '`<ocr> 50% </ocr><bbox>A,B,C,D</bbox>`' or '`<ocr> 50% </ocr><bbox>null</bbox>`', where 'A,B,C,D' or 'null' represents the bbox for '50%'. The items in "necessary bbox" is the necessary bbox(es) to refer to get the answer, and they must appear in explanation. The items in "necessary bbox" must also be formatted as follows:

'`<ocr> 50% </ocr><bbox>A,B,C,D</bbox>`' or '`<ocr> 50% </ocr><bbox>null</bbox>`', where 'A,B,C,D' or 'null' represents the bbox for '50%'. Assume you directly obtain the data based on the chart image, so avoid phrases like 'based on data', 'according to the dict' or specific color codes (e.g., '#ff3522'). Your answer should be simple.

User prompt: [Full-page parsing JSON data] + [ a Q&A sample from ChartQA]

#### PDF Document Q&A Generation Prompts for GPT-4o

##### PDF images

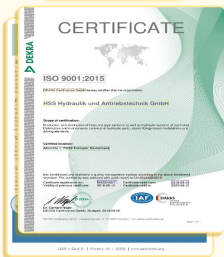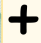

##### System prompt:

You are an expert in document reading. Express the original text from the document as much as possible in your reply and use '`<ocr></ocr>`'to enclose the unique origin key words or spans in document.

##### User Prompt:

Generate a summary of the document and 3 most valuable question & answer & explanation. Make sure your answer is a word or a span, it is correct and explanation is reasonable. The type can include multi-step reasoning, math reasoning, etc. The explanation should be simple but clear.

Note that the output should be in JSON format, like {'summary':'', 'QAs': [{'question':'', 'answer':'', 'explanation':''}, {'question':'', 'answer':'', 'explanation':''}]}

Figure 8. Prompts utilized as input to gpt-4o for poster, chart and PDF document.

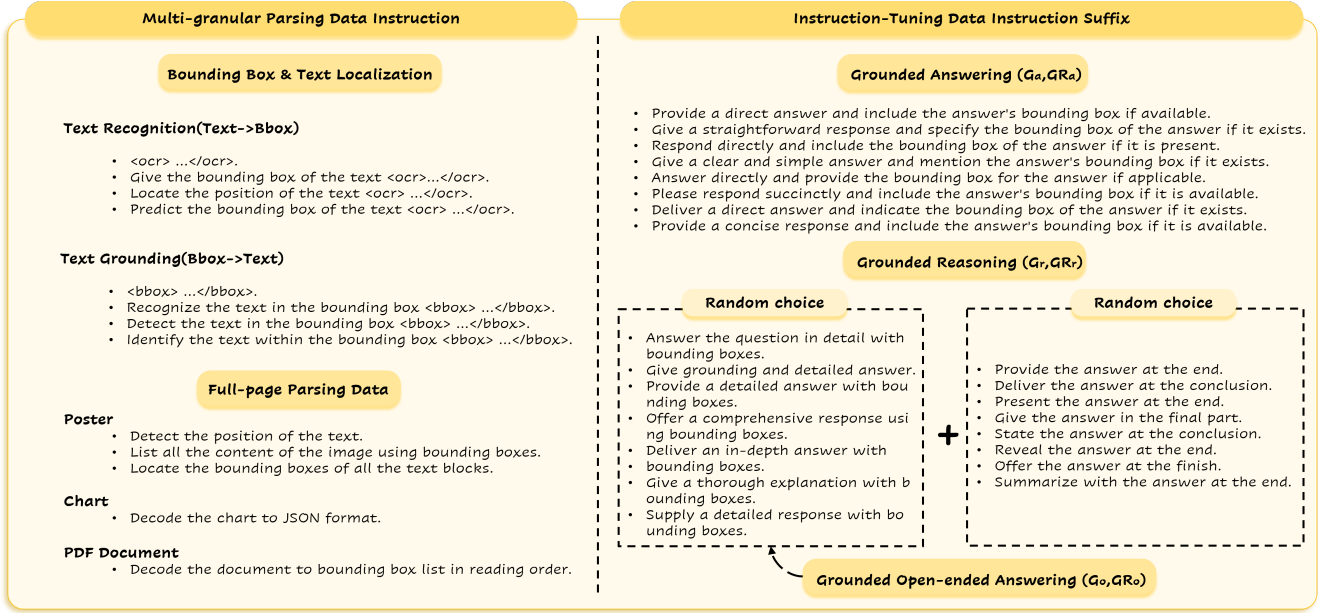

Figure 9. The instruction utilized in Multi-granular Parsing tasks and the response format prompts for instruction-tuning data.

## C. Qualitative Results

### C.1. Analysis about Fig. 1

We present the inference results of DOGR for grounding, grounding-and-referring, and referring tasks. The specific coordinates of the annotations are omitted, and the grounded text is highlighted with colored boxes. The colors of the boxes within the document image correspond to the colors of the text boxes. For the grounding task, we present four examples. The first sample demonstrates that DOGR can perform fine-grained question answering on general document images with rich content and complex layouts, successfully grounding the corresponding information. The second sample illustrates the model’s excellent recognition and localization capabilities for diverse and small text in poster-type images. Additionally, we showcase two samples of grounding in chart-type images, which indicate that DOGR possesses a certain level of mathematical ability, enabling it to provide grounded reasoning during calculation, as well as the capability to estimate values in charts that lack textual annotations based on the axes. For the grounding-and-referring and referring tasks, DOGR is able to recognize the content of user-selected regions and provide reasonable grounded or plain textual reasoning and responses. DOGR exhibits robust fine-grained grounding and referring capabilities, allowing for reliable grounded reasoning and accommodating diverse user interactions, significantly enhancing the overall user experience.

## C.2. More Qualitative Results

### C.2.1. DOGR-Bench Examples

As shown in Fig. 10, we present three inference examples of DOGR-Bench, demonstrating unlabeled value reading capability, grounding summarization capability, and referring summarization capability. The first figure is an example of reading unlabeled values. We add auxiliary mark boxes in red to the coordinate axes to facilitate reading the values, each box’s height represents 5. It can be observed that the model’s output values are accurate. The figure on the lower left is an example of grounding summarization for an entire document. DOGR is able to perceive the content of the entire document and perform grounding summarization effectively. The figure on the right is an example of referring summarization for a specific area. The model can also accomplish this task, thereby helping users improve reading efficiency.

### C.2.2. Other Examples

It is noteworthy that our model demonstrates strong generalization capabilities beyond some training domains and tasks, as illustrated in Fig. 11.

**Strong generalization.** As shown in the first row of examples, we feed DOGR with screenshots of the paper content and the specially shaped fan chart that the model does not process before. DOGR is able to correctly respond, demonstrating its strong generalization and usability in actual document reading scenarios.

**Handwriting ground-and-refer ability.** The middle sample showcases the model’s ability to recognize and ground-



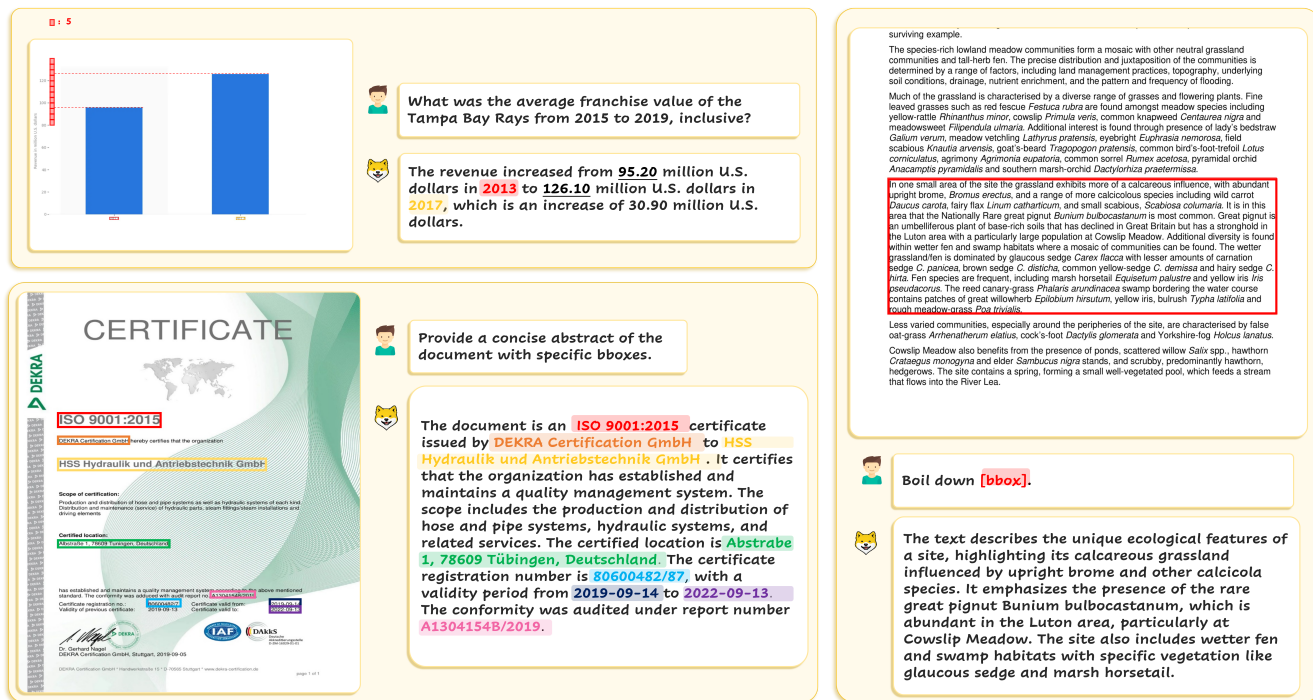

Figure 10. DOGR’s inference results on DOGR-Bench.

ing handwritten content. DOGR can fully understand this casual handwriting and provide grounded output. It is worth mentioning that our training data does not contain the grounding or referring tasks on such handwritten images.

**Other capabilities.** The bottom sample demonstrates an additional untrained capability of our model, specifically referring translation. DOGR is able to provide translations for the asked region. It is important to note that our training data do not include tasks similar to referring translation, even rarely includes languages other than English. Therefore, we believe that DOGR can effectively handle the relationship between regions and corresponding text, and seamlessly integrate the capabilities of large models with grounding and referring abilities.

### C.2.3. Failure Cases

Although DOGR demonstrates strong grounding and referring capabilities, there are still some shortcomings, as shown in Fig. 12.

**Referring.** The upper left figure illustrates an example of incorrect referring. It mistakenly associates the bounding box that should correspond to the text “INITIATIVE” in the question with the text “LOYALTY” below it. Additionally, its width is re-estimated according to the size corresponding to “LOYALTY,” resulting in an incorrect answer.

**Grounding.** When encountering some unfamiliar text content such as tables in the upper right image, DOGR can understand the content, effectively identified the line breaks between “Doc” and “VQA” and merged them together, and

provide correct answers, but the grounding boxes are inaccurate. There is also a issue of incomplete grounding content, such as the bottom sample, which often occurs when the content requiring grounding is interrupted or wrapped to the next line. Although this does not affect understanding, the text and bounding boxes provided by the model do not completely match.

**Comprehension.** When facing with some unfamiliar structural document, such as the chart shown in the middle right, the model gives incorrect answers. However, due to the intuitive expressiveness of grounding and referring, readers can quickly determine that the model’s answer is incorrect. These samples can also provide evidence of the model’s deficiencies, laying the foundation for further improvements.

Table 1. Data statistic of DOGE-Bench.

| Category | Grounding and Referring |       |          | Referring |       |          | Total |
|----------|-------------------------|-------|----------|-----------|-------|----------|-------|
|          | $G_A$                   | $G_R$ | $G_{RA}$ | $R_A$     | $R_R$ | $R_{RA}$ |       |
| Example  | 700                     | 800   | 630      | 342       | 627   | 775      | 464   |

finet classes based on both input and output formats. This classification helps in designing clear evaluation metrics. We divide the input formats into two categories based on the presence of bounding boxes: **Grounded Question (GQ)** with bounding boxes, and **Plain-Text Question (PQ)** without bounding boxes. The output formats are categorized into four classes:

- **Grounded Answer (GA)**: The response consists of a brief answer accompanied by its corresponding bounding box.
- **Grounded Reasoning (GR)**: The response includes the detailed reasoning process and the final answer, while the key text contents in the reasoning process are grounded.
- **Grounded Open-ended Answer (GO)**: An open-ended response with one or more key text contents grounded, without providing an answer in a certain format.
- **Plain Text Answer (PA)**: This format does not incorporate grounded text content.

By combining two input forms and four output forms, we derive seven document referring and grounding tasks. Among these tasks, three sub-tasks primarily assess grounding capability: grounded answering for plain-text questions ( $G_A$ ), grounded reasoning for plain-text questions ( $G_R$ ), and grounded open-ended answering for plain-text questions ( $G_{RA}$ ). The plain-text answering for grounded questions ( $R_A$ ) task evaluates referring capability. The remaining tasks, grounded answering with plain-text questions ( $R_R$ ), grounded reasoning for grounded questions ( $R_{RA}$ ), and grounded open-ended answering for grounded questions ( $R_{RA}$ ), require the integration of both grounding and referring capabilities for successful completion.

**Metrics.** Our benchmark evaluation encompasses two aspects: grounding performance and text answer accuracy. Following the previous works in grounded captioning [47], we evaluate the grounding and text answer separately. For grounding performance, we use  $F1_{GI}$  score, which evaluates grounding results as a multi-label classification problem. The generated grounded text is considered correct if Intersection over Union (IoU) between its bounding box and the GT bounding box is greater than 0.5, meanwhile its text matches with the GT text. For text answer accuracy, we use exact text matching accuracy for short-answer tasks and BLEU scores for long-answer tasks.

**Data Statistics.** Our DOGE-Bench includes 2K grounding samples, 0.5K referring samples, and 15K grounding-and-referring samples. The detailed statistics is shown in Tab. 1.

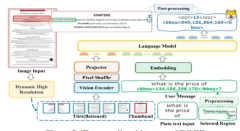

Figure 5. The overall architecture of DOGE.

## 5. DOGE

**Overall Architecture.** As illustrated in Fig. 5, our model DOGE employs a general MLLM architecture, including a vision encoder, a projector, and a large language model. In the vision encoder component, to enable the model to handle high resolution, we first search for the best aspect ratio for the input image and dynamically segment images into multiple tiles. These tiles, along with a thumbnail of the input image, are provided as input to the vision encoder. We employ pixel shuffle [5] to improve the computational efficiency of the model when processing high-resolution images. For bounding box representation, we simply discretize the continuous coordinates into discrete values from 0 to 999, avoiding the introduction of extra module or location tokens. During inference, we transfer the user-selected regions to coordinates of bounding boxes and insert them into the query for preprocessing. After obtaining the output, we utilize post-processing to overlay bounding boxes on original document images, thereby facilitating user interaction.

**Training Strategy.** We adopt a three-stage training strategy, including pre-aligning, pre-training, and fine-tuning. The pre-aligning stage focuses on aligning the feature space of vision and language rapidly. In this stage, we freeze both vision encoder and large language model, and train the projector with a relatively large learning rate. The pre-training stage aims at document parsing capabilities. We unfreeze the vision encoder and the LLM, enabling the model to recognize diverse textual content and acquire text-reading capability. In the fine-tuning stage, we train the entire model using diverse instruction-tuning data, enhancing its instruction-following ability while activating its grounding and referring capabilities during dialogue and reasoning.

**Training Dataset.** In the pre-aligning stage, we utilize LLaVA-558K [21] to train the projector. For the pre-training dataset, we utilize DocStruct4M [10] along with our 1.4M multi-granular parsing data to enhance basic text reading, text grounding, and text referring capabilities of DOGE. For the fine-tuning data, we adopt our ground-and-refer instruction-tuning data and meticulously selected

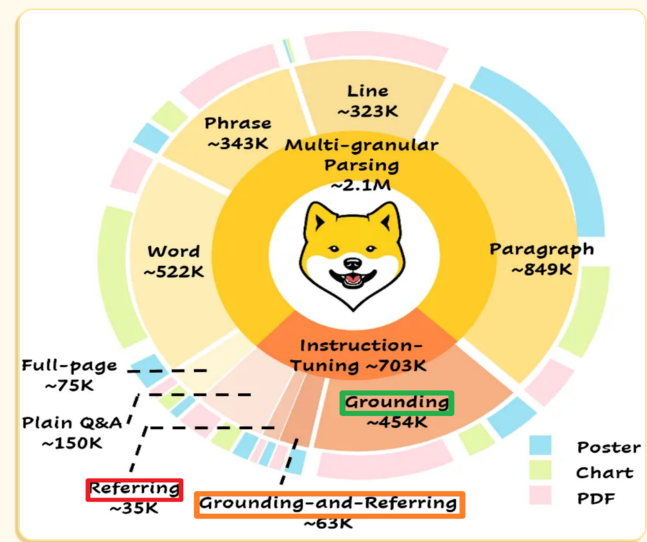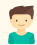

How many output formats are there?

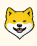

There are four output formats:

**Grounded Answer (GA),**  
**Grounded Reasoning (GR),**  
**Grounded Open-ended Answer (GO),**  
**and**  
**Plain Text Answer (PA).**

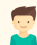

What's the sum of [bbox], [bbox], and [bbox]?

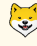

The sum of **Referring**, **Grounding-and-Referring**, and **Grounding** is 35K + 63K + 454K = 552K.

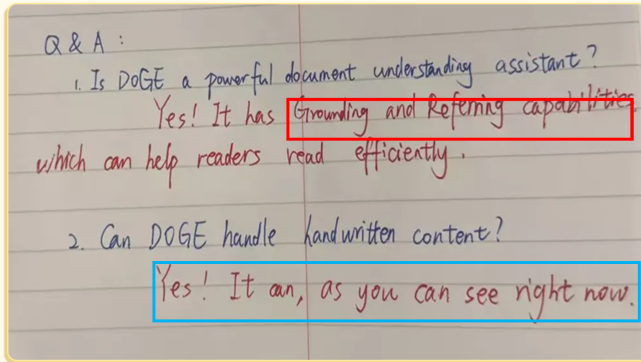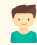

Why is DOGE useful?

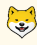

DOGE is useful because it has **Grounding and Referring capabilities**, which help readers read efficiently.

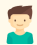

Can DOGE recognize manuscript?

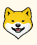

Yes, DOGE can handle handwritten content. This is confirmed by the text **'Yes! It can, as you can see right now.'**

## 1. Introduction

In recent years, Multimodal Large Language Models (MLLMs) [5, 12, 14, 15, 20, 31, 44–46] have achieved significant advancements in general visual understanding and reasoning by integrating pre-trained vision encoders with large language models. Leveraging the diverse fine-grained annotations of existing image datasets, some researchers further equip MLLMs with grounding and referring capabilities. These capabilities enhance the detailed visual understanding, increase the credibility of responses, and facilitate more efficient human-AI interaction.

In the field of visual document understanding, the dense textual content and complex layout significantly complicate fine-grained understanding. To build a user-friendly and trustworthy document AI assistant, it is crucial to enable users to refer to specific regions of a document for more precise comprehension and provide accurate grounding of key details for more expressive and effective interaction.

However, due to the lack of high-quality, fine-grained document datasets, the full potential of MLLMs in document grounding and referring remains largely unexplored. Existing efforts leverage the multi-granularity parsing annotations to enhance document detailed perception [10], or introduce region-level instruction-tuning tasks to achieve basic referring capabilities [18]. However, these works have two significant shortcomings:

ing data, which includes text box annotations at the word, phrase, line, paragraph and full-page level across poster, chart and PDF document. This dataset is utilized to enhance basic text localization and recognition capabilities and serves as the foundation for creating instruction-tuning data. 2) a diverse set of 700K instruction-tuning data. This includes both text in location-out (grounding) and location-in text-out (referring) data, as well as data that combines location and text in both input and output. These instruction-tuning data are constructed based on our multi-granular document parsing data via the assistance of GPT-4s [12], possessing high linguistic quality and accurate ground-and-refer annotations.

Furthermore, in visual document understanding, evaluation tasks related to grounding and referring are relatively scarce, making it challenging to assess the model's corresponding capabilities. To this end, we propose **DOGE-Bench**, which contains 4K text samples and encompasses 7 grounding and referring tasks across 3 document types (chart, poster, PDF document). Finally, based on data generated by our engine, we develop a strong baseline model, **DOGE**, capable of understanding spatial referring and accurately grounding text within document images. We report the performance of our model on DOGE-Bench, providing a performance reference for future research.

In summary, our contributions are threefold. (1) We introduce DOGE-Engine, a data construction pipeline that

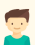

Translate [bbox] into Chinese.

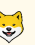

然而，由于缺乏高质量的细粒度文档数据集，MLLMs在文档定位和引用方面的潜力仍然未被充分利用。现有努力利用多粒度解析注释来增强文档详细感知[10]，或引入区域级指令调谐任务以实现基本引用能力[18]。然而，这些工作有两个显著的局限性：

Figure 11. Other DOGR's inference samples.

### Incorrect Referring

**CHARACTER CORE**

**ALERTNESS**  
Being aware of what is taking place around me so I can respond appropriately

**ATTENTIVENESS**  
Concentrating on the person or task before me

**AVAILABILITY**  
Willingness to change my schedule and priorities to meet a need

**CAUTIOUSNESS**  
Taking time to ensure the right decision is made or action is taken

**COMPASSION**  
Helping those in need

**COOPERATION**  
Understanding others so I can effectively work with them

**COURAGE**  
Overcoming fear by saying and doing what is right

**CREATIVITY**  
Approaching a need, a task, or an idea from a new perspective

**DECISIVENESS**  
Processing information and finalizing difficult decisions

**DEPENDABILITY**  
Fulfilling commitments even in the face of difficulty

**DETERMINATION**  
Overcoming obstacles in order to reach my goal

**DILIGENCE**  
Focusing my effort on the work at hand

**DISCIPLINE**  
Choosing behaviors to help me reach my goals

**ENDURANCE**  
The inner strength to withstand stress and do my best

**ENTHUSIASM**  
Expressing interest and excitement in what I do

**FLEXIBILITY**  
Adjusting to change with a good attitude

**FORGIVENESS**  
Releasing feelings of resentment

**GENEROSITY**  
Managing resources to freely give

**GRATEFULNESS**  
Demonstrating appreciation to others for what I have and how they have helped me

**HONESTY**  
Being truthful in what I say and do

**HUMILITY**  
Recognizing the people and factors that have shaped my life

**INITIATIVITY**  
Recognizing and doing what needs to be done before I am asked to do it

**LOYALTY**  
Demonstrating commitment to others

**ORDERLINESS**  
Organizing my thoughts and surroundings for greater achievement

**PATIENCE**  
Taking the time necessary to work through a difficult situation

**PERSUASIVENESS**  
Effectively communicating with others so they can better understand

**POSITIVITY**  
Maintaining a good attitude, even when faced with difficulty

**PUNCTUALITY**  
Showing respect for others by doing the right thing at the right time

**RESILIENCE**  
Recovering from adversity

**RESPECT**  
Treating others with honor and dignity

**RESPONSIBILITY**  
Knowing and doing what is expected of me

**SINCERITY**  
Doing what is right with transparent motives

**THOROUGHNESS**  
Taking care of necessary details

**TOLERANCE**  
Demonstrating respect for others who do not share my perspective

**TRUSTWORTHINESS**  
Gaining the confidence of others by demonstrating reliability

**WISDOM**  
Making practical application of what is learned

ENGAGE YOUR TEAM. INSPIRE YOUR PEOPLE. CREATE A WINNING CULTURE.

© 2015 Strata Leadership LLC • StrataLeadership.com • 877.357.0001

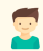

How is [bbox] described in the document?

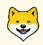

**LOYALTY** is defined as the commitment to others, emphasizing the importance of being dedicated and supportive in relationships.

Answer:

Demonstrating commitment to others

**Correct Answer:**

Recognizing and doing what needs to be done before I am asked to do it.

### Inaccurate Grounding

Table 3. Performance comparison on 10 general document benchmarks.

| Model               | Size | DocVQA      | InfoVQA     | DeepForm    | KLC         | WTQ         | TabFact     | ChartQA     | TextVQA     | TextCaps     | VisualMRC    |
|---------------------|------|-------------|-------------|-------------|-------------|-------------|-------------|-------------|-------------|--------------|--------------|
| Donut[13]           | 1B   | 67.5        | 11.6        | 61.6        | 30.0        | 18.8        | 54.6        | 41.8        | 43.5        | 74.4         | 93.91        |
| DocOwl[9]           | 7B   | 62.2        | 38.2        | 42.6        | 30.3        | 26.9        | 60.2        | 57.4        | 52.6        | 111.9        | 188.8        |
| URReader[43]        | 7B   | 65.4        | 42.2        | 49.5        | 32.8        | 29.4        | 67.6        | 59.3        | 57.6        | 118.4        | 221.7        |
| TextMonkey[16]      | 9B   | 73.0        | 28.6        | 59.7        | 37.8        | 31.9        | -           | 66.9        | 65.9        | -            | -            |
| Vary[39]            | 7B   | 76.3        | -           | -           | -           | -           | -           | 66.1        | -           | -            | -            |
| TokenPacker[40]     | 13B  | 70.0        | -           | -           | -           | -           | -           | -           | -           | -            | -            |
| DocPeida[8]         | 7B   | 47.1        | 15.2        | -           | -           | -           | -           | 46.9        | 60.2        | -            | -            |
| QwenVL[1]           | 9B   | 65.1        | 35.4        | -           | -           | -           | -           | 65.7        | 63.8        | -            | -            |
| IXC 2.5[50]         | 7B   | 90.9        | 70.0        | 71.2        | -           | 53.6        | 85.2        | 82.2        | 78.2        | -            | 307.5        |
| DocOwl-1.5-Chat[10] | 8B   | 82.2        | 50.7        | 68.8        | 38.7        | 40.6        | 80.2        | 70.2        | 68.6        | 131.6        | 246.4        |
| DocOwl-2[11]        | 8B   | 80.7        | 46.4        | 66.8        | 37.5        | 36.5        | 78.2        | 70.0        | 66.7        | 131.8        | 217.4        |
| IncrnVL2[6]         | 8B   | 91.6        | 74.8        | -           | -           | -           | -           | 83.3        | 77.4        | -            | -            |
| <b>DocQ</b>         | 8B   | <b>91.7</b> | <b>70.7</b> | <b>70.8</b> | <b>40.4</b> | <b>58.8</b> | <b>84.5</b> | <b>83.6</b> | <b>76.6</b> | <b>145.9</b> | <b>332.5</b> |

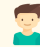

Which method has the best performance on DocVQA?

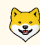

The method with the best performance on DocVQA is **DocQ**, achieving a score of 91.7.

### Incorrect comprehension

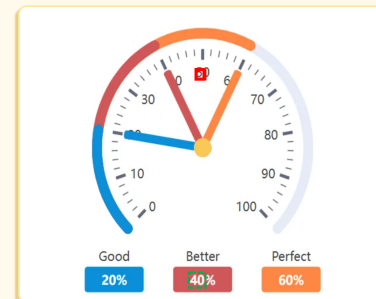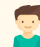

What's the value of the red pointer?

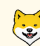

The red pointer is at 50.

**Correct Answer:**

The red pointer is at 40.

### Incomplete Grounding

#### CICR

Search results for "DROIT INTERNATIONAL PENAL" (Keyword in French)

|                     |                                                                                                |
|---------------------|------------------------------------------------------------------------------------------------|
| Document type:      | Periodical Issue                                                                               |
| Title:              | Punishment and society : the international journal of penology [Vol. 14, no. 5, December 2012] |
| Languages:          | English                                                                                        |
| Keyword in English: | DEPRIVATION OF LIBERTY<br>CRIMINAL LAW<br>INTERNATIONAL CRIMINAL LAW                           |
| Keyword in French:  | PRIVATION DE LIBERTE<br>DROIT PENAL<br>DROIT INTERNATIONAL PENAL                               |
| Go to:              | Punishment and society : the international journal of penology                                 |

| Issue text                    | Issue date | Status   | Item number | Call number / Mark | Location | Disposability | Due date |
|-------------------------------|------------|----------|-------------|--------------------|----------|---------------|----------|
| Vol. 14, no. 5, December 2012 | 01.02.2013 | received | 100032202   | PER                | BIB      | Available     |          |

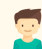

What is the title of the periodical issue related to 'DROIT INTERNATIONAL PENAL'?

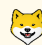

Punishment and society : the international journal of penology [Vol. 14, no. 5, December 2012]

**Text in its bbox:**

Punishment and society : the international journal of penology [Vol. 14, no. 5,

Figure 12. Failure cases of DOGR.

Table 6. The detailed composition of the DOGR dataset’s Multi-granular parsing data and Instruction-Tuning data.

| Type                   | Number    | SubType               | Number  | SubSubType | Number  |
|------------------------|-----------|-----------------------|---------|------------|---------|
| Multi-granular Parsing | 2,114,414 | Full Page             | 75,391  | Poster     | 20,867  |
|                        |           |                       |         | Chart      | 31,716  |
|                        |           |                       |         | PDF        | 22,808  |
|                        |           | Word                  | 522,682 | Poster     | 65,446  |
|                        |           |                       |         | Chart      | 354,731 |
|                        |           |                       |         | PDF        | 102,505 |
|                        |           | Span                  | 343,596 | Poster     | 56,006  |
|                        |           |                       |         | Chart      | 58,212  |
|                        |           |                       |         | PDF        | 229,378 |
|                        |           | Line                  | 323,211 | Poster     | 5,577   |
|                        |           |                       |         | Chart      | 6,268   |
|                        |           |                       |         | PDF        | 311,366 |
|                        |           | Paragraph             | 849,534 | Poster     | 511,998 |
|                        |           |                       |         | Chart      | 229,378 |
|                        |           |                       |         | PDF        | 108,158 |
| Instruction-Tuning     | 703,724   | Grounding             | 454,404 | Poster     | 96,718  |
|                        |           |                       |         | Chart      | 62,636  |
|                        |           |                       |         | PDF        | 295,050 |
|                        |           | Grounding + Referring | 63,243  | Poster     | 36,663  |
|                        |           |                       |         | Chart      | 849     |
|                        |           |                       |         | PDF        | 25,731  |
|                        |           | Referring             | 35,197  | Poster     | 19,207  |
|                        |           |                       |         | Chart      | 618     |
|                        |           |                       |         | PDF        | 15,372  |
|                        |           | Plain Text Q&A        | 150,880 | Poster     | 35,831  |
|                        |           |                       |         | Chart      | 45,948  |
|                        |           |                       |         | PDF        | 69,101  |

## D. Dataset Details

### D.1. Dataset Statistic

As shown in Tab. 6, we present the detailed composition of the DOGR dataset’s Multi-granular Parsing data and Instruction Tuning data. The Multi-granular Parsing data includes five granularities: word, phrase, line, paragraph, and full-page parsing. The Instruction-Tuning data comprises three types of grounded data: grounding referring, grounding-and-referring, and plain text Q&A. We provide the detailed data volume for each type.

Fig. 13 shows the distribution of block counts for poster, chart, and PDF document. Poster has fewer grounded blocks within each image, larger areas, diverse font styles, and larger font sizes. The average text length per block for poster is 3.25 words. Chart, on the other hand, has a higher number of blocks with small areas and small font sizes. Each block in a chart corresponds to a small component value within the chart, with an average text length of 1.34 words per block. PDF document has a moderate distribution of block counts, larger areas, and small font sizes. Each block in a PDF contains relatively longer text, with an average length of 22.55 words per block.

### D.2. Construction Cost Details

In terms of multi-granular parsing data construction, DOGR-Engine can achieve boundary box annotation and content extraction on any document dataset with a similar rendering process. It can also scale up to a larger volume of PDF source files without additional manual costs. When constructing instruction fine-tuning data, our main cost lies

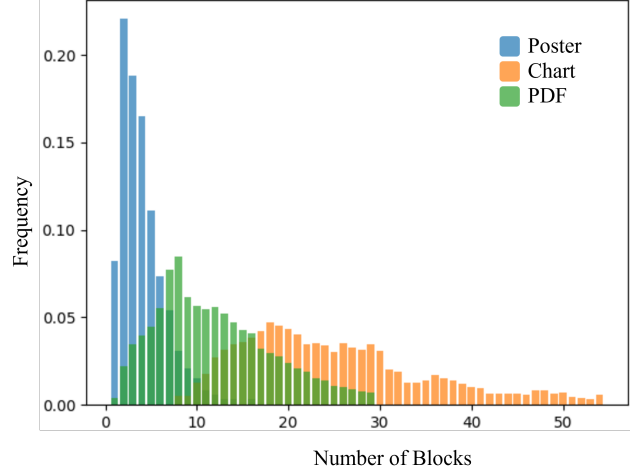

Figure 13. Block count distribution of poster, chart, and PDF.

in the API calls to GPT-4o. We use the version gpt-4o-2024-08-06. For poster and chart, our input is long text containing full page parsing data, while for PDF, the input is document images plus short prompt texts. During construction, we can generate multiple question and answer pairs for a single image simultaneously and use batch API requests to save costs. Ultimately, we can construct over 1,000 grounded question and answer pairs for an average cost of \$1, which is far more efficient and cost-effective than manual construction.

### D.3. Hallucinations Avoidance

Regarding hallucinations, GPT-4o is quite capable of handling our tasks. By manual checking, we observe that hallucinations occur **very rarely**. We also filter out samples where the text and bounding boxes do not correspond correctly. Additionally, for DOGR-Bench, we manually filter out the samples that contain hallucinations or other errors.

## E. Training Data Details

For the pre-training data, we utilize DocStruct4M [14] along with our 2.1M multi-granular parsing data to enhance DOGR’s foundational grounding and referring capabilities.

For the fine-tuning data, we compose our 703k Instruction-Tuning data with 575k DocDownStream-1.0 data from [14] and 716k other document-related data from various datasets, resulting in a final fine-tuning dataset of 2M. In Tab. 7, we show the detailed data source and sampled number of 716k other document-related data.



Table 7. The detailed statistics of 716k other document-related data.

| Dataset                            | # Samples | Dataset                    | # Samples |
|------------------------------------|-----------|----------------------------|-----------|
| IIIT5K [36]                        | 1,990     | RoBUT WTQ[65]              | 38,241    |
| TextOCR-GPT4V [3]                  | 25,104    | AI2D (InternVL [6])        | 12,403    |
| FigureQA [18]                      | 1,000     | Infographic VQA [35]       | 8,489     |
| Diagram Image2Text                 | 295       | LRV Chart [26]             | 1,776     |
| K12 Printing                       | 20,000    | SROIE                      | 33,616    |
| AI2D (GPT4V Detailed Caption) [19] | 4,864     | MultiHierrt                | 7,614     |
| VisText [46]                       | 9,964     | RoBUT WikiSQL              | 74,984    |
| ChartQA [32]                       | 18,260    | VisualMRC[45]              | 3,022     |
| DVQA [17]                          | 20,000    | TextCaps [41]              | 21,942    |
| Magpie Pro [56] (L3 ST)            | 50,000    | Chart2Text [37]            | 26,956    |
| HiTab [9]                          | 2,495     | HME100K [61]               | 74,492    |
| RoBUT SQA                          | 8,509     | Magpie Pro (L3 MT)         | 50,000    |
| ChromeWriting [55]                 | 8,825     | Magpie Pro (Qwen2 ST)      | 50,000    |
| Screen2Words [51]                  | 15,725    | Rendered Text [55]         | 9,995     |
| IAM [31]                           | 5,658     | TQA [20]                   | 27,302    |
| AI2D (Original)                    | 2,429     | SynthDog-EN [21]           | 40,000    |
| MMC bInstruction Arxiv[27]         | 20,000    | MMC bInstruction NON-Arxiv | 20,000    |

## F. Detailed Evaluation of MLLMs on DOGR-Bench.

### F.1. Evaluation Prompt

Since models other than InternVL2.5 and QwenVL2.5 do not have a clearly defined format for grounding or referring content, we directly interpret the input using the prompt shown in Fig. 15(Right) and restrict the output format for evaluation. For InternVL2.5, the use of `<ref></ref>` is required to trigger grounding capabilities. Therefore, when outputs require answers and corresponding coordinates, we additionally include `<ref></ref>` to obtain a more standardized output for evaluation. For QwenVL2.5, since the model outputs pixel coordinates of the input image rather than the coordinates normalized according to the respective width and height, we first convert the coordinates in our input to facilitate the model’s accurate understanding of location information. We also restrict the output content to closely mimic the existing JSON format for evaluation purposes. For example, in reasoning tasks, the model first outputs a JSON list, then generates an explanation, and finally provides the answer. After obtaining the output, we normalize the output coordinates based on the input size for evaluation. The prompt we use for Qwen2.5 is shown in Fig. 15(Left).

### F.2. Limited Grounding Ability

Although both InternVL2.5[7] and QwenVL2.5[1] can perform general image grounding, such as providing bounding boxes for a target based on a description, as shown in Fig. 16, when handling document grounding, we use a grounding-triggering prompt to obtain the output coordinates corresponding to the given content. InternVL2.5-72B consistently outputs inaccurate and unstable bounding boxes, while QwenVL2.5 also produces a large number of inaccurate bounding boxes. These simple examples illustrate the models’ shortcomings in document grounding capabilities.

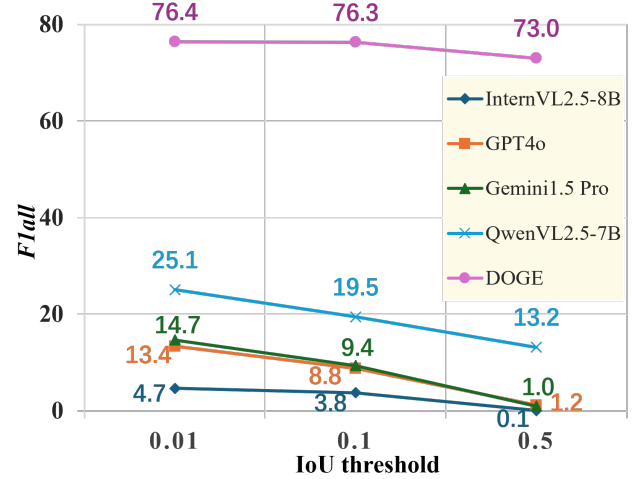

Figure 14. MLLM’s  $G_a F1_{all}$  comparison on different IoU threshold.

### F.3. IoU Threshold Sensitivity

We also conduct a statistical analysis of the  $G_a F1_{all}$  scores of different MLLMs at various IoU thresholds. As shown in Fig. 14, among the MLLMs analyzed, apart from DOGR, Qwen2.5VL-7B exhibits the best grounding capability. DOGR is not sensitive to changes in the IoU threshold, indicating that the limitation on DOGR’s  $G_a F1_{all}$  is due to the model’s reasoning capabilities. DOGR has already overcome the performance degradation caused by inaccurate grounding. In contrast, the insufficient basic grounding capabilities of other MLLMs make them very sensitive to changes in the IoU threshold, with their  $G_a F1_{all}$  scores dropping to nearly 0 when the IoU threshold is set to 0.5.

## G. More Experiments

**Effectiveness of our pretraining data.** To better assess base performance of pretrained model using our multi-granular parsing data, we further introduce our text&bbox localization test set **DOGR-Local15k** comprising four granularities (word, phrase, line, paragraph) across three categories of data: poster, chart, and general document, similar to DocLocal4k[14]. DOGR<sup>-</sup> is pre-trained without using our constructed multi-granular parsing data. For the chart data, we claim that the chart type annotations in DocStruct4M for during DOGR<sup>-</sup>’s pre-training are inconsistent with our grounding training objectives, which aims to match the text and the bbox. In the original data, the text corresponds to bounding boxes of bar/line charts. Therefore, these value is not referenceable, and we mark them in gray. Moreover, in the case where the granularity of data categories for charts is relatively singular, we directly re-

Table 8. Grounding and recognition performance comparison of the same model pretrained w. and w.o. our pretraining data.

|                   | Poster       |              |              |              |              | PDF Document |              |              |              |              | Chart        |
|-------------------|--------------|--------------|--------------|--------------|--------------|--------------|--------------|--------------|--------------|--------------|--------------|
| Text Grounding    |              |              |              |              |              |              |              |              |              |              |              |
| Model             | word         | phrase       | line         | paragraph    | ALL          | word         | phrase       | line         | paragraph    | ALL          | ALL          |
| DOGR <sup>-</sup> | 58.0         | 63.12        | 58.96        | 76.43        | 63.19        | 33.88        | 47.62        | 51.5         | 62.88        | 48.97        | 24.03        |
| DOGR              | <b>91.88</b> | <b>94.62</b> | <b>96.28</b> | <b>91.04</b> | <b>93.53</b> | <b>70.25</b> | <b>82.25</b> | <b>87.5</b>  | <b>83.62</b> | <b>80.91</b> | <b>86.12</b> |
| Text Recognition  |              |              |              |              |              |              |              |              |              |              |              |
| DOGR <sup>-</sup> | 83.34        | 60.96        | 41.67        | 36.95        | 55.73        | 49.66        | 58.62        | 50.34        | 47.27        | 51.47        | 68.86        |
| DOGR              | <b>92.94</b> | <b>94.05</b> | <b>86.52</b> | <b>86.08</b> | <b>89.9</b>  | <b>73.57</b> | <b>86.48</b> | <b>76.85</b> | <b>71.8</b>  | <b>77.17</b> | <b>95.24</b> |

| QwenVL Prompt for DOGE-Bench Eval                                                                                                                                                                                                                                                                                                                                                                                                          | Other Prompt for DOGE-Bench Eval                                                                                                                                                                                                                                                                                                                                                                                                                                                                                                                                                                                                                                                                                       |
|--------------------------------------------------------------------------------------------------------------------------------------------------------------------------------------------------------------------------------------------------------------------------------------------------------------------------------------------------------------------------------------------------------------------------------------------|------------------------------------------------------------------------------------------------------------------------------------------------------------------------------------------------------------------------------------------------------------------------------------------------------------------------------------------------------------------------------------------------------------------------------------------------------------------------------------------------------------------------------------------------------------------------------------------------------------------------------------------------------------------------------------------------------------------------|
| <b>Grounded Answering (<math>G_a, GR_a</math>)</b><br><code>text_prompt += "Answer the question with a simple text answer following 'Answer: ', and then corresponding bbox coordinate in [x1, y1, x2, y2] format following 'Bbox: '. [x1, y1, x2, y2] is the bounding box of the answer."</code>                                                                                                                                          | <b>Grounded Answering (<math>G_a, GR_a</math>)</b><br><code>text_prompt += " You should directly answer the question use a simple answer, and the answer should be given in the format of grounded blocks like &lt;ocr&gt; answer &lt;/ocr&gt;&lt;bbox&gt;x1, y1, x2, y2&lt;/bbox&gt;, in which the answer is the text from the image and the two coordinates is the left-top and right-bottom position of the text in the image. &lt;bbox&gt;&lt;/bbox&gt; must following corresponding &lt;ocr&gt;&lt;/ocr&gt;. Make sure your output format is correct."</code>                                                                                                                                                     |
| <b>Grounded Reasoning (<math>G_r, GR_r</math>)</b><br><code>text_prompt += "You should prepare the key text of your reasoning and corresponding bbox coordinate in JSON format, like ``json\n[{\n\"bbox_2d\": [x1,y1,x2,y2],\n\"text\": \"\n\"]\n``. The text should be exactly the content in bbox_2d. After the json output, give a reasoning. At the end, you should give a short and simple final answer following 'Answer: '."</code> | <b>Grounded Reasoning (<math>G_r, GR_r</math>)</b><br><code>text_prompt += " You should give a reasoning. In the reasoning, you should wrap some text in the document using grounded blocks like &lt;ocr&gt; text &lt;/ocr&gt;&lt;bbox&gt;x1, y1, x2, y2&lt;/bbox&gt;, in which the text is from the image and the two coordinates is the left-top and right-bottom position of the text in the image. Make sure your output format is correct. &lt;bbox&gt;&lt;/bbox&gt; must following corresponding &lt;ocr&gt;&lt;/ocr&gt;. And you must give the final simple answer at the end following 'Answer: '. And the grounded blocks should be as much as possible. The text and coordinates should be accurate."</code> |
| <b>Grounded Open-ended Answering (<math>G_o, GR_o</math>)</b><br><code>text_prompt += "You should prepare the key text of your reasoning and corresponding bbox coordinate in JSON format, like ``json\n[{\n\"bbox_2d\": [x1,y1,x2,y2],\n\"text\": \"\n\"]\n``. The text should be exactly the content in bbox_2d. After the json output, give a reasoning."</code>                                                                        | <b>Grounded Open-ended Answering (<math>G_o, GR_o</math>)</b><br><code>text_prompt += " You should give a response. In the response, you should wrap some text from the document using grounded blocks like &lt;ocr&gt; text &lt;/ocr&gt;&lt;bbox&gt;x1, y1, x2, y2&lt;/bbox&gt;, in which the text is from the image and the two coordinates is the left-top and right-bottom position of the text in the image. &lt;bbox&gt;&lt;/bbox&gt; must following corresponding &lt;ocr&gt;&lt;/ocr&gt;. Make sure your output format is correct. And the grounded blocks should be as much as possible. The text and coordinates should be accurate."</code>                                                                 |
| <b>Referring Related (<math>R_t, GR_a, GR_r, GR_o</math>)</b><br><code>text_prompt = "Answer the following question related to the region [x1, y1, x2, y2] of the image. Question:" + text_prompt</code>                                                                                                                                                                                                                                   | <b>Referring Related (<math>R_t, GR_a, GR_r, GR_o</math>)</b><br><code>text_prompt = "Answer the following question related to the region &lt;bbox&gt;x1, y1, x2, y2&lt;/bbox&gt; of the image. The two coordinates is the left-top and right-bottom position of the text in the image. Question:" + text_prompt</code>                                                                                                                                                                                                                                                                                                                                                                                                |

Figure 15. Prompts using in evaluation MLLMs on DOGR-Bench.

ported the results for "ALL".

As shown in Tab. 8, after incorporating our multi-granular parsing data for pre-training, the model exhibits enhancements in text recognition and grounding tasks. Our improvements on DOGR-Local15k are significant, thereby laying a solid foundation for accurate document grounding interactions.

**The performance boost of data generated by GPT-4o.** We utilize a weaker LLM, *Gemini 1.5 flash*, to generate 25k chart grounding QA data (Gemini25k). As shown in Tab.9, both Gemini25k and GPT-4o25k lead to improve-

ment on ChartQA, which is mainly because constructed QA data enriches the original data. However, GPT-4o's stronger instruction-following capability results in a larger amount of grounded texts in the constructed QA, making it better than gemini-1.5-flash on  $G_r$  task.

**Importance of accurate bounding box annotation.** To validate importance of accurate bounding box annotation, we conduct experiments on chart data. We perform random offset and scaling of bboxes in GPT4o data within 30% to get 25k  $G_r$  inaccurate training data GPT4o25k<sup>-</sup> with errors for chart. We compare the performance gain of 25k

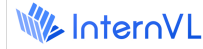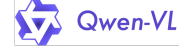

Please provide the bounding box coordinates of the region this sentence describes: <ref> COURAGE </ref>.

Please provide all coordinates of the word in thr chart in JSON FORMAT.

1<sup>st</sup> Attempt

COURAGE[[77, 560, 233, 596]]

2<sup>nd</sup> Attempt:

COURAGE[[67, 535, 218, 563]]

3<sup>rd</sup> Attempt

COURAGE[[81, 539, 244, 572]]

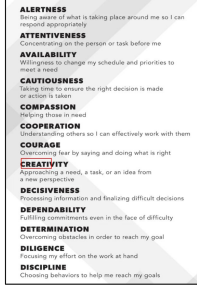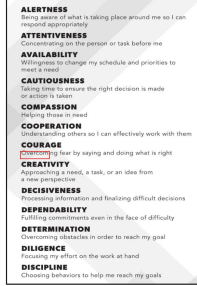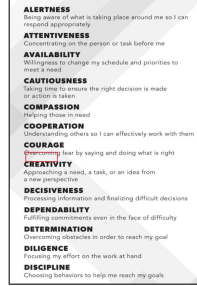

```
[{"bbox_2d": [145, 706, 198, 730], "text_content": "2016"},
{"bbox_2d": [260, 706, 313, 730], "text_content": "2017"},
{"bbox_2d": [375, 706, 428, 730], "text_content": "2018"},
{"bbox_2d": 490, 706, 543, 730},
{"bbox_2d": 605, 706, 658, 730},
{"bbox_2d": 720, 706, 773, 730},
{"bbox_2d": 835, 706, 888, 730},
{"bbox_2d": 950, 706, 1000, 730}]
```

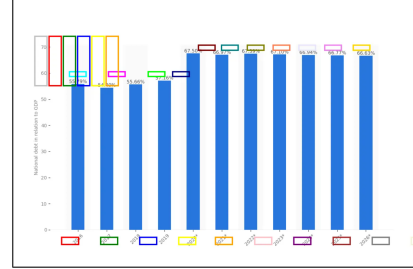

Figure 16. QwenVL2.5-72B and InternVL2.5-72B are all struggle with document grounding.

rerendered data with accurate bboxes and 25k grounded data with inaccurate bboxes on ChartQA and  $G_r$  of chart on DO-Bench. Both text are from GPT-4o. As shown in Tab.10, adding GPT4o25k<sup>-</sup>, the performance on ChartQA is improved and the model possesses grounding capabilities. Adding accurate annotation data GPT4o25k<sup>-</sup> leads to more precise bboxes, thus largely improving the grounding performance(F1 of  $G_r$ ).

Table 9. The performance boost of data generated by GPT-4o and weaker Gemini 1.5 flash.

| Training Data     | ChartQA-Acc | Gr-Acc | Gr-F1 |
|-------------------|-------------|--------|-------|
| baseline(ChartQA) | 80.92       | -      | -     |
| +GPT4o25k         | 81.88       | 67.0   | 32.91 |
| +Gemini25k        | 81.98       | 50.12  | 1.10  |

Table 10. Accurate bbox is helpful for grounding.

| Training Data          | ChartQA-Acc | Gr-Acc | Gr-F1 |
|------------------------|-------------|--------|-------|
| baseline(ChartQA)      | 80.92       | -      | -     |
| +GPT4o25k <sup>-</sup> | 81.42       | 66.1   | 20.2  |
| +GPT4o25k              | 81.88       | 67.0   | 32.91 |
